# Supplementary material for: Characterization of the Volatile Constituents of Plai (Zingiber purpureum) by Gas Chromatography–Mass Spectrometry
Source: MDPI journal article supplement (doi:10.3390/molecules29061216), 2024-03-08
Supplement: s1 [file s1]

# Supporting Information

## **Characterization of the Volatile Constituents of Plai (*Zingiber purpureum*) by Gas Chromatography–Mass Spectrometry**

Yuto Nishidono <sup>1,2,\*</sup>, Azis Saifudin <sup>3</sup> and Ken Tanaka <sup>1</sup>

1 College of Pharmaceutical Sciences, Ritsumeikan University, Kusatsu 525-8577,  
Shiga, Japan; ktanaka@fc.ritsumei.ac.jp

2 Research Organization of Science and Technology, Ritsumeikan University,  
Kusatsu 525-8577, Shiga, Japan

3 Faculty of Pharmacy, Universitas Muhammadiyah Surakarta, Sukoharjo 57102,  
Jawa Tengah, Indonesia; azis.saifudin@ums.ac.id

\* Correspondence: nisidono@fc.ritsumei.ac.jp; Tel.: +81-77-561-5179

## List of contents

|                                                                                                                                                                   |   |
|-------------------------------------------------------------------------------------------------------------------------------------------------------------------|---|
| <b>Table S1.</b> Relative contents (%) of major 30 compounds in ethyl acetate extracts derived from the rhizomes of plai purchased in Thailand and Indonesia..... | 3 |
| <b>Figure S1.</b> EI-MS spectra of isolated compounds. ....                                                                                                       | 4 |

**Table S1.** Relative contents (%) of major 30 compounds in ethyl acetate extracts derived from the rhizomes of plai purchased in Thailand and Indonesia.

| Peak | Compounds Annotated or Identified via This Study                 | Relative contents (%) |           |
|------|------------------------------------------------------------------|-----------------------|-----------|
|      |                                                                  | Thailand              | Indonesia |
| 1    | $\alpha$ -Thujene (1)                                            | 1.1                   |           |
| 2    | $\alpha$ -Pinene (2)                                             | 1.0                   |           |
| 3    | Sabinene (3)                                                     | 10.9                  |           |
| 4    | $\beta$ -Pinene (4)                                              | 1.9                   |           |
| 5    | Myrcene (5)                                                      | 0.9                   |           |
| 6    | $\alpha$ -Terpinene (6)                                          | 1.4                   |           |
| 7    | <i>p</i> -Cymene (7)                                             | 3.2                   |           |
| 8    | $\gamma$ -Terpinene (8)                                          | 2.1                   |           |
| 9    | <i>trans</i> -4-Thujanol (9)                                     | 0.8                   |           |
| 10   | <i>cis</i> -4-Thujanol (10)                                      | 0.8                   |           |
| 11   | Terpinen-4-ol (11)                                               | 8.3                   |           |
| 12   | 3,4-Dimethoxybenzaldehyde (12)                                   |                       | 7.8       |
| 13   | $\beta$ -Sesquiphellandrene (13)                                 | 1.9                   |           |
| 14   | ( <i>E</i> )-1-(3',4'-Dimethoxyphenyl)but-1-ene (14)             | 1.3                   |           |
| 15   | ( <i>E</i> )-1-(3',4'-Dimethoxyphenyl)buta-1,3-diene (15)        | 5.9                   |           |
| 16   | Xanthorrhizol (16)                                               |                       | 4.5       |
| 17   | ( <i>E</i> )-1-(2',4',5'-Trimethoxyphenyl)but-1-ene (17)         | 1.0                   |           |
| 18   | ( <i>E</i> )-3-(3',4'-Dimethoxyphenyl)propenal (18)              |                       | 6.2       |
| 19   | ( <i>E</i> )-1-(2',4',5'-Trimethoxyphenyl)buta-1,3-diene (19)    | 2.9                   |           |
| 20   | ( <i>E</i> )-4-(3',4'-Dimethoxyphenyl)but-3-en-1-ol (20)         | 9.4                   | 21.5      |
| 21   | Cassumunol H (21)                                                |                       | 8.5       |
| 22   | ( <i>E</i> )-4-(3',4'-Dimethoxyphenyl)but-3-en-1-yl acetate (22) | 4.2                   | 12.5      |
| 23   | <i>cis</i> -Banglene (23)                                        | 7.6                   | 4.2       |
| 24   | <i>trans</i> -Banglene (24)                                      | 9.4                   | 24.4      |
| 25   | 2'-Methoxy <i>cis</i> -banglene (25)                             | 3.1                   |           |
| 26   | 2'-Methoxy <i>trans</i> -banglene (26)                           | 3.0                   |           |
| 27   | 2'''-Methoxy <i>cis</i> -banglene (27)                           | 3.0                   |           |
| 28   | 2'''-Methoxy <i>trans</i> -banglene (28)                         | 4.5                   |           |
| 29   | 2', 2'''-Dimethoxy <i>cis</i> -banglene (29)                     | 3.7                   |           |
| 30   | 2', 2'''-Dimethoxy <i>trans</i> -banglene (30)                   | 1.9                   |           |

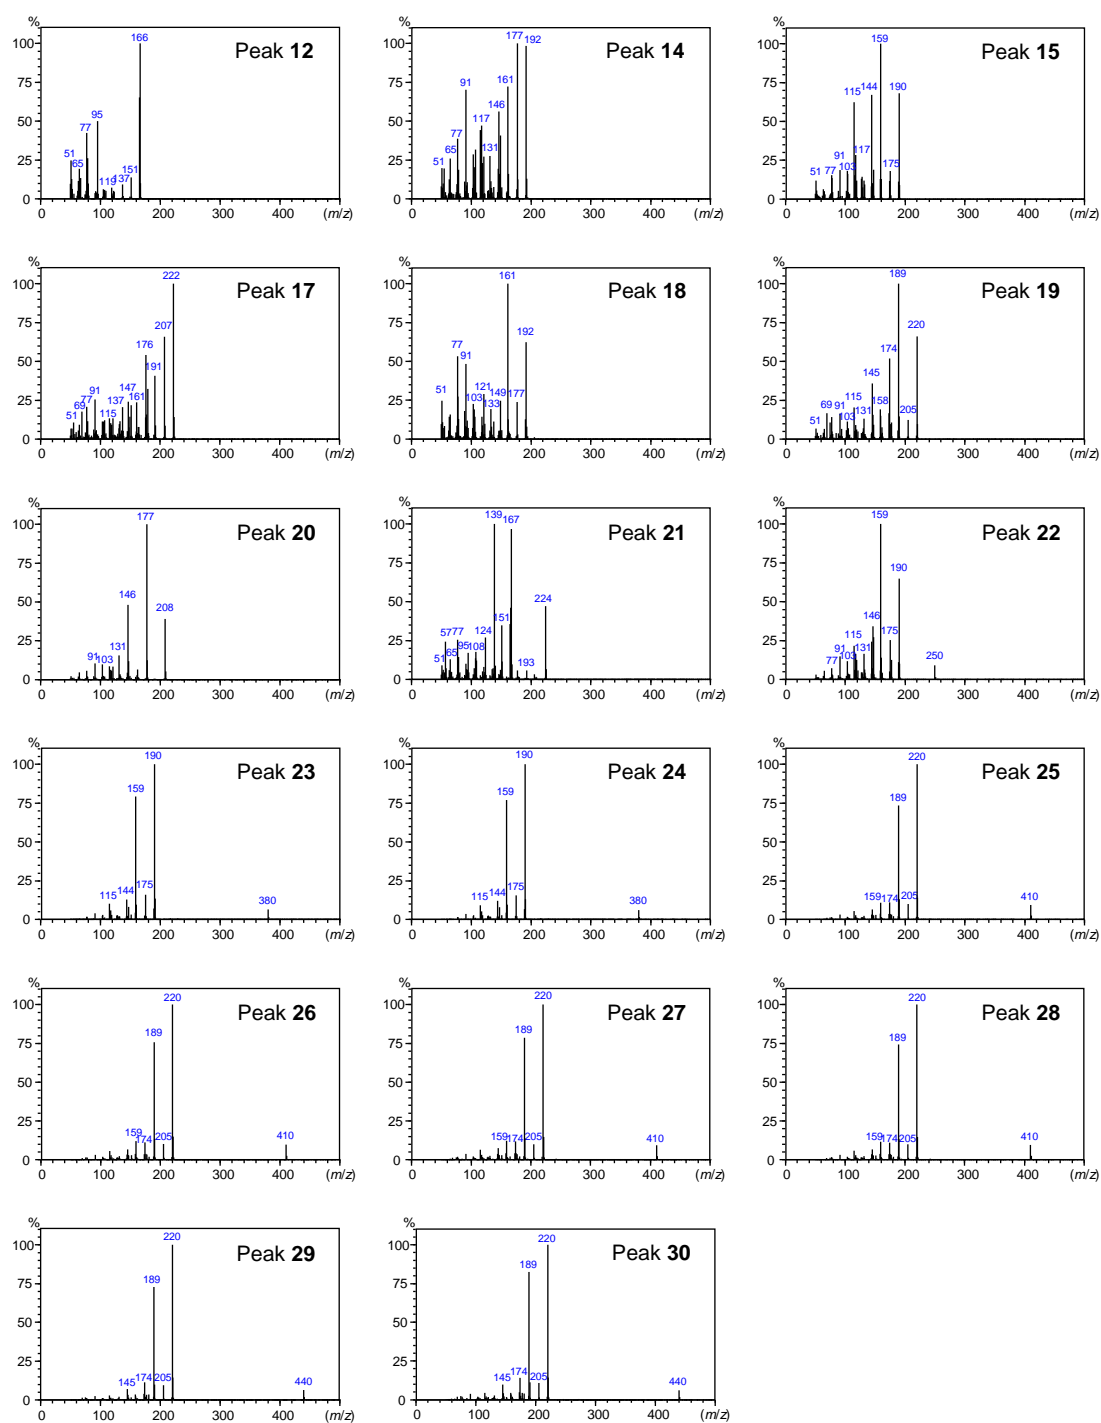

**Figure S1.** EI-MS spectra of isolated compounds.
